# Supplementary material for: Flexible all-in-one zinc-ion batteries
Source: Royal Society of Chemistry journal article supplement (doi:10.1039/c9nr06476a), 2019-01-01
Supplement: c9nr06476a1.pdf [file c9nr06476a1.pdf]

## Supporting Information

### Flexible All-in-one Zinc-ion Batteries

Yan Zhang, Qingrong Wang, Songshan Bi, Minjie Yao, Fang Wan, Zhiqiang Niu\*

Key Laboratory of Advanced Energy Materials Chemistry (Ministry of Education), Renewable Energy Conversion and Storage Center, College of Chemistry, Nankai University, Tianjin, 300071, P. R. China

Email: zqniu@nankai.edu.cn

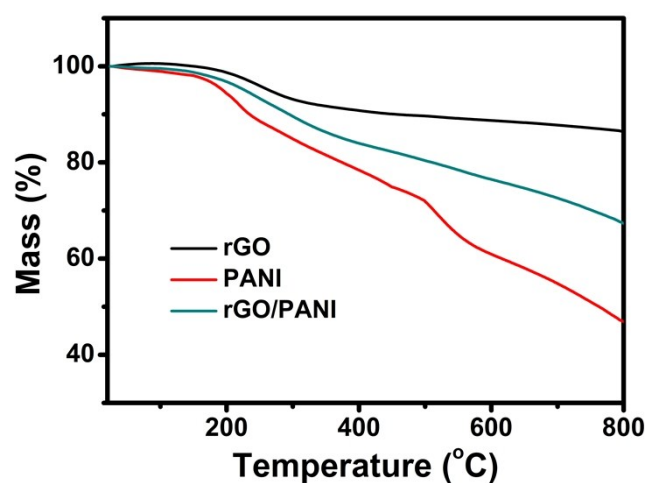

**Fig. S1.** Thermogravimetric analysis (TGA) curves of rGO, PANI and rGO/PANI.

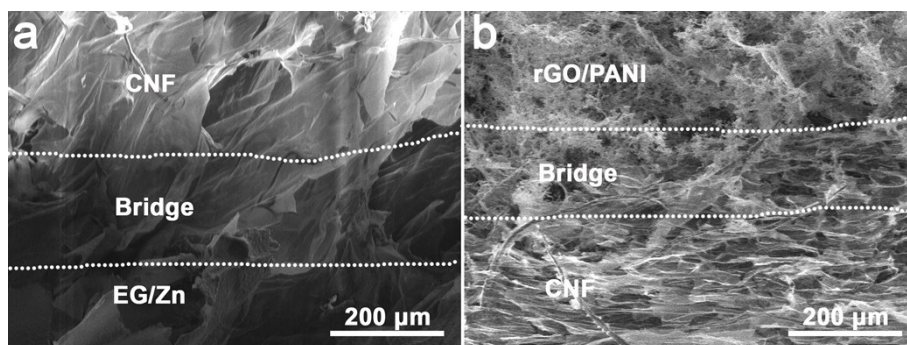

**Fig. S2.** The cross-sectional SEM images of all-in-one architecture of (a) CNF-EG/Zn and (b) rGO/PANI-CNF, respectively.

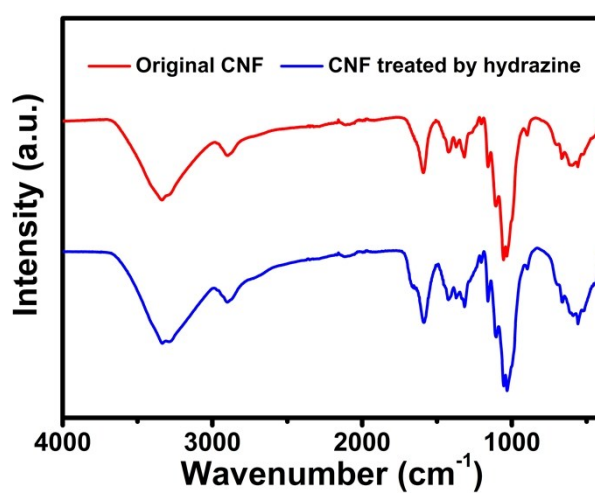

**Fig. S3.** FTIR spectra of CNF before and after hydrazine treatment.

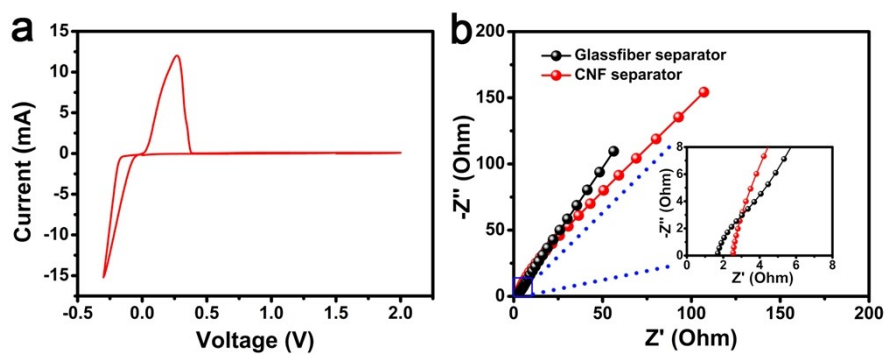

**Fig. S4.** (a) CV curve of the battery between -0.4 and 2.0 V at a scan rate of  $1.0 \text{ mV s}^{-1}$ . The battery used EG/Zn as anode, CNF as separator and steel as cathode, respectively. (b) Nyquist plots of fresh cells based on glassfiber and CNF as separator, respectively.

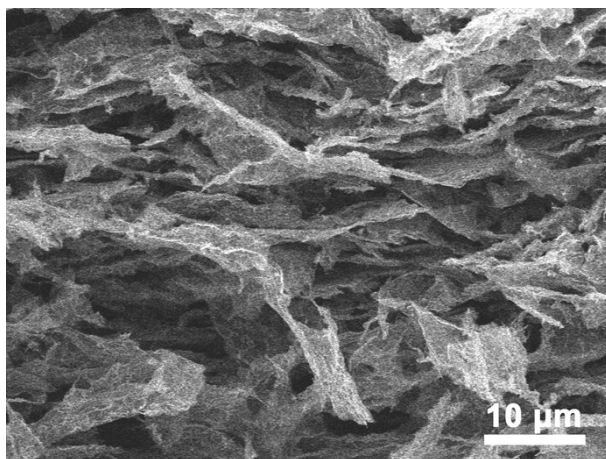

**Fig. S5.** Cross-sectional SEM image of the rGO/PANI film after compression.

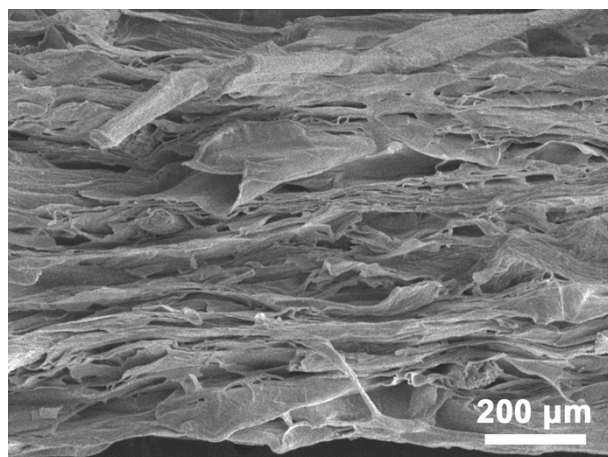

**Fig. S6.** Cross-sectional SEM image of the CNF film after compression.

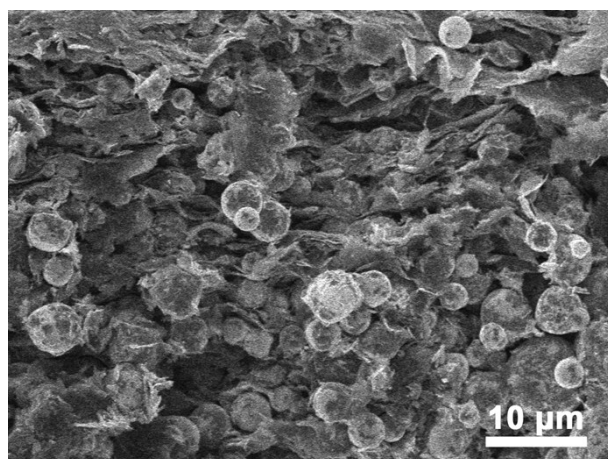

**Fig. S7.** Cross-sectional SEM image of the EG/Zn film after compression.

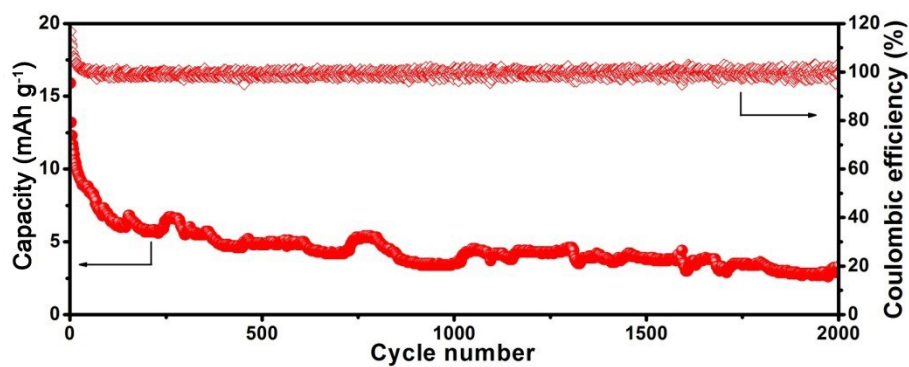

**Fig. S8.** The cycling performance of pure rGO at a current density of  $0.1 \text{ A g}^{-1}$ .

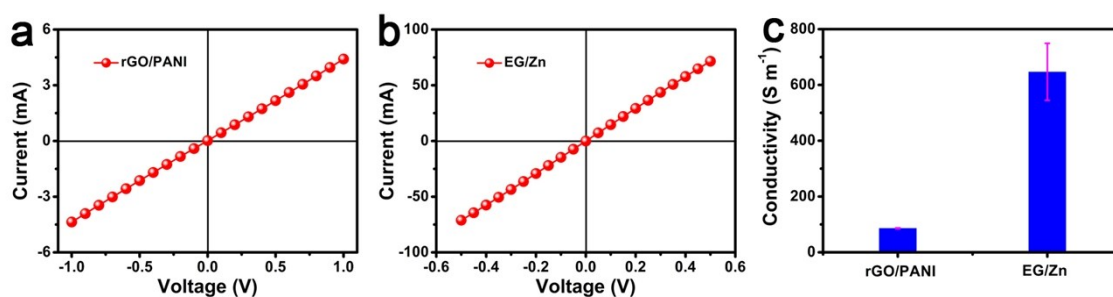

**Fig. S9.** I-V curves of (a) rGO/PANI cathode and (b) EG/Zn anode. (c) The conductivity of the rGO/PANI cathode and EG/Zn anode.

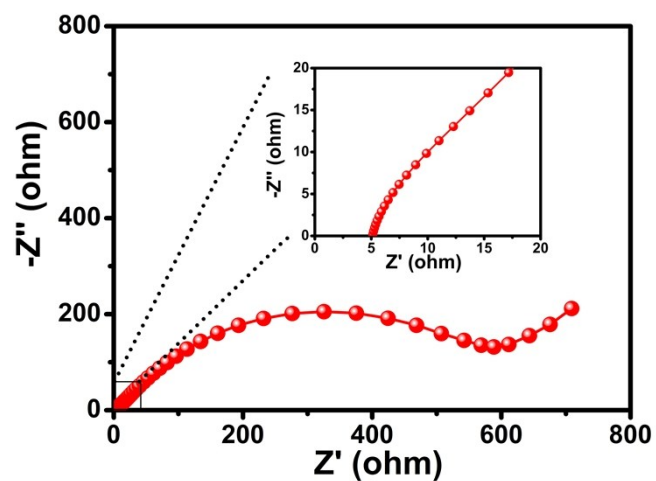

**Fig. S10.** EIS spectra of the all-in-one ZIBs.

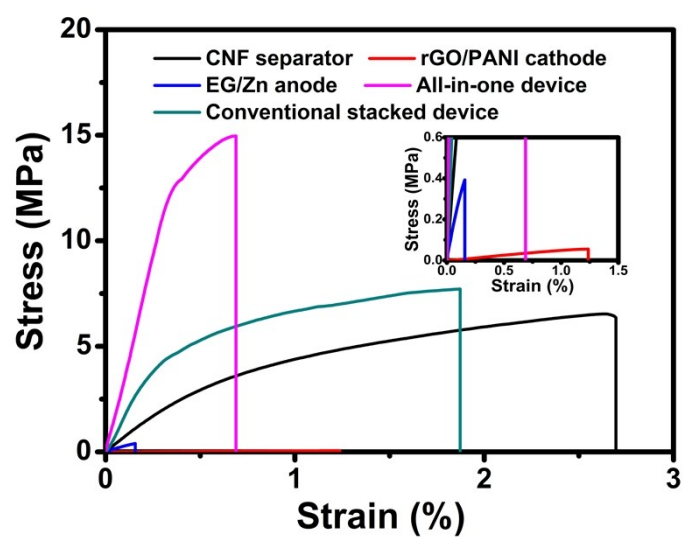

**Fig. S11.** Stress-strain curves of rGO/PANI cathode, CNF separator, EG/Zn anode, conventional stacked device, and all-in-one device.

**Table S1.** The tensile strength and Young's modulus of individual rGO/PANI cathode, CNF separator, EG/Zn anode, conventional stacked device, and all-in-one device.

|                             | Stress (%) | Tensile strength<br>(MPa) | Young's modulus<br>(GPa) |
|-----------------------------|------------|---------------------------|--------------------------|
| EG/Zn anode                 | 0.16       | 0.4                       | 0.3                      |
| rGO/PANI cathode            | 1.23       | 0.1                       | $4.0 \times 10^{-3}$     |
| CNF separator               | 2.70       | 6.4                       | 0.6                      |
| Conventional stacked device | 1.87       | 7.7                       | 1.6                      |
| All-in-one device           | 0.69       | 15.0                      | 3.7                      |
